# Supplementary material for: Nobiletin mitigates NAFLD via lipophagy and inflammation
Source: Royal Society of Chemistry journal article supplement (doi:10.1039/d2fo01682f), 2022-01-01
Supplement: d2fo01682f1.xlsx [file d2fo01682f1.xlsx]

## Sheet: Sheet1
Group
CONTROL		MODEL		L-NOB		M-NOB		H-NOB
ID	WEIGHT	ID	WEIGHT	ID	WEIGHT	ID	WEIGHT	ID	WEIGHT
220	21.05	232	20.73	240	20.63	243	20.3	245	20.81
279	20.06	259	20.72	223	20.67	251	20.24	247	20.49
215	20.67	257	19.27	238	20.28	225	20.79	236	21.32
282	21.14	144	21.96	299	21.89	221	21.87	212	21.43
276	21.22	252	21.16	224	21.42	241	21.65	217	21.92
216	21.97	253	21.16	246	22.6	228	22.26	237	22.06
249	22.37	133	22.72	227	22.38	230	22.31	226	21.99
138	22.53	204	22.25	207	22.31	234	22.59	235	22.52
206	23.12	141	23.13	143	23.34	292	23.82	137	23.74
261	23.26	135	23.27	208	22.82	297	23.17	229	23.36
231	23.52	136	23.53	244	22.9	201	23.74	274	24.46
209	25.81	213	24.35	139	25.94	210	24.06	278	24.06
233	25.37	222	25.83	284	24.13	280	25.71	134	25.73
275	25.02	285	25.09	268	26.47	248	26.61	140	26.28
239	26.57	267	27.61	262	26.85	294	25.97	300	26.04
296	27.12	263	26.63	271	26.61	205	26.82	266	26.23
AVERAGE	23.175		23.0881		23.2025		23.2444		23.2775
SD	2.21144		2.33285		2.19865		2.14925		2.0045
