# Supplementary material for: Nobiletin mitigates NAFLD via lipophagy and inflammation
Source: Royal Society of Chemistry journal article supplement (doi:10.1039/d2fo01682f), 2022-01-01
Supplement: d2fo01682f2.pdf [file d2fo01682f2.pdf]

The specificity of primers sequence in this study was checked by the tool of Primer-BLAST from website of NCBI, and the results were displayed as followed:

```
>NM_001289726.1 Mus musculus glyceraldehyde-3-phosphate dehydrogenase (Gapdh), transcript variant 1, mRNA

product length = 580
Forward primer 1   AAGCCCATCACCATCTTCCA  20
Template       300 ..... 319

Reverse primer 1   CCTGCCTCACCACCTTCTTG  20
Template       879 .....T..... 860
```

Supplemented figure 1 the search result for primer sequence of GAPDH

```
>NM_001313921.1 Mus musculus nitric oxide synthase 2, inducible (Nos2), transcript variant 2, mRNA

product length = 576
Forward primer 1   GTGTTCACCAGGAGATGTTG  21
Template       1411 ..... 1431

Reverse primer 1   CTCCIGCCCACTGAGTTCGTC  21
Template       1986 ..... 1966
```

Supplemented figure 2 the search result for primer sequence of iNOS2

```
>NM_031168.2 Mus musculus interleukin 6 (Il6), transcript variant 1, mRNA

product length = 339
Forward primer 1   GTTCTCTGGGAAATCGTGGA  20
Template       250 ..... 269

Reverse primer 1   GGAAATTGGGGTAGGAAGGA  20
Template       588 ..... 569
```

Supplemented figure 3 the search result for primer sequence of IL-6

```
>NM_001278601.1 Mus musculus tumor necrosis factor (Tnf), transcript variant 2, mRNA

product length = 128
Forward primer 1   TCTTCTCATTCCCTGCTTGTTG  21
Template       271 ..... 291

Reverse primer 1   GGTCTGGGCCATAGAACTGA  20
Template       398 ..... 379
```

Supplemented figure 4 the search result for primer sequence of TNF $\alpha$

>NM\_010548.2 Mus musculus interleukin 10 (Il10), mRNA

product length = 298

Forward primer 1 GTTACTTGGGTTGCCAAG 18

Template 294 ..... 311

Reverse primer 1 TTGATCATCATGTATGCTTC 20

Template 591 ..... 572

Supplemented figure 5 the search result for primer sequence of IL-10

>NM\_008625.2 Mus musculus mannose receptor, C type 1 (Mrc1), mRNA

product length = 84

Forward primer 1 GCCAGAGACATAACAGCAGC 20

Template 2864 ..... 2883

Reverse primer 1 AATGCCAACCTTCCTTGCAG 20

Template 2947 ..... 2928

Supplemented figure 6 the search result for primer sequence of CD206/Mrc1
